# Supplementary material for: Effect of Culture Medium pH on Chlorpyrifos Biodegradation and Metabolic Profiles of a Novel Enterobacter strain
Source: Research Square preprint supplement (doi:10.21203/rs.3.rs-8130012/v1), 2025-12-01
Supplement: Supplementary file 1 [file 54012e4a82a9a7e38fd93c09.docx]

**Supplementary file**

Table (1) shown *Enterobacter* sp. n1bioactive compounds that result from strain at pH 6 as a result of degradation of CPH in MSM after 5day at 30℃.

| Peak | RT | Name | Formula | Area | Area Sum % |
| --- | --- | --- | --- | --- | --- |
| 1 | 9.809 | Hexadecane | C16H34 | 15596583.09 | 0.91 |
| 2 | 12.247 | 2-Propenoic acid, 2-methyl-, dodecyl ester | C16H30O2 | 32663247.02 | 1.9 |
| 3 | 12.424 | cis-13-Octadecenoic acid | C18H34O2 | 25676149.54 | 1.5 |
| 4 | 12.481 | n-Dodecyl methacrylate | C16H30O2 | 66873560.2 | 3.9 |
| 5 | 12.567 | Isodecyl methacrylate | C14H26O2 | 49916286.26 | 2.91 |
| 6 | 12.659 | Eicosane | C20H42 | 145883560.7 | 8.5 |
| 7 | 12.809 | 1-Dodecanamine, N,N-dimethyl- | C14H31N | 123722001.7 | 7.21 |
| 8 | 12.939 | 2,4-Di-tert-butylphenol | C14H22O | 26470319.72 | 1.54 |
| 9 | 13.019 | 2-Hexadecanol | C16H34O | 40041575.32 | 2.33 |
| 10 | 13.214 | tert-Hexadecanethiol | C16H34S | 47058661.34 | 2.74 |
| 11 | 13.809 | 1-Hexadecanol, 2-methyl- | C17H36O | 20202642.77 | 1.18 |
| 12 | 13.9 | Ethanol, 2-(octadecyloxy)- | C20H42O2 | 33675265.34 | 1.96 |
| 13 | 14.456 | Octadecane, 3-ethyl-5-(2-ethylbutyl)- | C26H54 | 22099534.08 | 1.29 |
| 14 | 15.045 | Heptadecane | C17H36 | 19837593.66 | 1.16 |
| 15 | 15.199 | Tetradecane, 2,6,10-trimethyl- | C17H36 | 32442972.07 | 1.89 |
| 16 | 15.829 | (3-Methyl-1,4-diphenylbicyclo [2.2.0] hex-2-yl)methanol | C20H22O | 64137645.45 | 3.74 |
| 17 | 17.442 | 5-Hydroxy-6-methyl-12,13-dioxa-tricyclo[7.3.1.0(1,6)]tridecane-8-carboxylic acid, methyl ester | C14H22O5 | 39937066.84 | 2.33 |
| 18 | 17.54 | 7,9-Di-tert-butyl-1-oxaspiro(4,5)deca-6,9-diene-2,8-dione | C17H24O3 | 66563184.99 | 3.88 |
| 19 | 17.854 | Estra-1,3,5(10)-trien-17.beta.-ol | C18H24O | 73976207.2 | 4.31 |
| 20 | 17.963 | n-Hexadecanoic acid | C16H32O2 | 43026242.56 | 2.51 |
| 21 | 18.284 | Chlorpyrifos | C9H11Cl3NO3PS | 153471838.8 | 8.95 |
| 22 | 19.474 | Octadecanoic acid, 4-hydroxy-, methyl ester | C19H38O3 | 34367374.85 | 2 |
| 23 | 19.846 | 2-Methyl-cis-7,8-epoxynonadecane | C20H40O | 26370468.82 | 1.54 |
| 24 | 21.677 | Tetracosane | C24H50 | 19699959.24 | 1.15 |
| 25 | 22.306 | Cyclohexane, 1,3,5-triphenyl- | C24H24 | 67587079.44 | 3.94 |
| 26 | 23.113 | Benzene, 1,1'-[2-methyl-2-(phenylthio)cyclopropylidene]bis- | C22H20S | 94995449.17 | 5.54 |
| 27 | 23.222 | 1-Propene, 3-(2-cyclopentenyl)-2-methyl-1,1-diphenyl- | C21H22 | 132357655.1 | 7.72 |
| 28 | 23.273 | 1,3-Butadiene, 1,4-diphenyl-, (E,E)- | C16H14 | 52477572.89 | 3.06 |
| 29 | 23.342 | 1H-Indole, 1-methyl-2-phenyl- | C15H13N | 60679177.86 | 3.54 |
| 30 | 24.664 | 4H-1-Benzopyran-4-one, 2-(3,4-dimethoxyphenyl)-3,5-dihydroxy-7-methoxy- | C18H16O7 | 25712085.79 | 1.5 |
| 31 | 31.473 | Phenol, 2,4-bis(1,1-dimethylethyl)-, phosphite (3:1) | C42H63O3P | 38297902.96 | 2.23 |
| 32 | 34.952 | Benzenepropanoic acid, 3,5-bis(1,1-dimethylethyl)-4-hydroxy-, octadecyl ester | C35H62O3 | 19613584.89 | 1.14 |

Table (2). Major bioactive compounds that result from *Enterobacter* sp. n1 at **pH 7** ,150 ppm and 30℃ as a result of degradation of CPF in liquid MSM after 5 day.

| Peak | Center X | Name | Formula | Area | Area Sum % |
| --- | --- | --- | --- | --- | --- |
| 1 | 4.15 | Styrene | C8H8 | 3080985 | 0.47 |
| 2 | 6.931 | Undecane | C11H24 | 1842951 | 0.28 |
| 3 | 7.034 | Nonanal | C9H18O | 1780386 | 0.27 |
| 4 | 7.234 | Phenylethyl Alcohol | C8H10O | 2825618 | 0.43 |
| 5 | 9.517 | Hexadecane | C16H34 | 4081869 | 0.62 |
| 6 | 11.017 | 1-Tetradecanol | C14H30O | 3121741 | 0.47 |
| 7 | 11.114 | Tetradecane | C14H30 | 1226235 | 0.19 |
| 8 | 12.596 | 2,4-Di-tert-butylphenol | C14H22O | 6242439 | 0.95 |
| 9 | 12.893 | Disulfide, di-tert-dodecyl | C24H50S2 | 2459954 | 0.37 |
| 10 | 13.5 | Cetene | C16H32 | 3043154 | 0.46 |
| 11 | 13.58 | Nonadecane | C19H40 | 2984309 | 0.45 |
| 12 | 14.106 | Phytol | C20H40O | 2678153 | 0.41 |
| 13 | 14.347 | Benzene, 1,1'-(1,3-propanediyl) bis- | C15H16 | 2536555 | 0.39 |
| 14 | 14.724 | Tetradecane, 2,6,10-trimethyl- | C17H36 | 3499259 | 0.53 |
| 15 | 14.885 | [2.2]Paracyclophane | C16H16 | 15186873 | 2.31 |
| 16 | 15.125 | Naphthalene, 1,2,3,4-tetrahydro-2-phenyl- | C16H16 | 20431223 | 3.1 |
| 17 | 15.342 | Hexadecane, 2,6,10,14-tetramethyl- | C20H42 | 3216880 | 0.49 |
| 18 | 15.514 | Benzene, 1,1'-(1,2-cyclobutanediyl) bis-, trans- | C16H16 | 61292093 | 9.31 |
| 19 | 15.732 | EMDP | C19H21N | 5124954 | 0.78 |
| 20 | 15.806 | Octadecane | C18H38 | 2559865 | 0.39 |
| 21 | 15.915 | tert-Hexadecanethiol | C16H34S | 2257149 | 0.34 |
| 22 | 15.955 | Naphthalene, 1,2-dihydro-4-phenyl- | C16H14 | 1819987 | 0.28 |
| 23 | 16.55 | 7-Acetyl-6-ethyl-1,1,4,4-tetramethyltetralin | C18H26O | 1241621 | 0.19 |
| 24 | 16.842 | Docosane, 11-decyl- | C32H66 | 2684166 | 0.41 |
| 25 | 17.116 | Heptacosane | C27H56 | 3486743 | 0.53 |
| 26 | 17.185 | 7,9-Di-tert-butyl-1-oxaspiro (4,5) deca-6,9-diene-2,8-dione | C17H24O3 | 4549803 | 0.69 |
| 27 | 17.511 | n-Hexadecanoic acid | C16H32O2 | 21289523 | 3.23 |
| 28 | 17.694 | Estra-1,3,5(10)-trien-17.beta.-ol | C18H24O | 1599923 | 0.24 |
| 29 | 17.923 | Chlorpyrifos | C9H11Cl3NO3PS | 9753392 | 1.48 |
| 30 | 19.371 | Octadecanoic acid | C18H36O2 | 6984067 | 1.06 |
| 31 | 19.48 | cis-Trismethoxyresveratrol | C17H18O3 | 7473291 | 1.13 |
| 32 | 21.15 | 9-Octadecenamide, (Z)- | C18H35NO | 1592801 | 0.24 |
| 33 | 22.009 | Cyclohexane, 1,3,5-triphenyl- | C24H24 | 74913065 | 11.38 |
| 34 | 22.672 | Bis(2-ethylhexyl) phthalate | C24H38O4 | 6364249 | 0.97 |
| 35 | 22.81 | Benzene, 1,1'-[2-methyl-2-(phenylthio)cyclopropylidene]bis- | C22H20S | 92716465 | 14.08 |
| 36 | 22.93 | 1-Propene, 3-(2-cyclopentenyl)-2-methyl-1,1-diphenyl | C21H22 | 1.16E+08 | 17.56 |
| 37 | 22.976 | 1,3-Butadiene, 1,4-diphenyl-, (E, E)- | C16H14 | 43773095 | 6.65 |
| 38 | 23.039 | 1H-Indole, 1-methyl-2-phenyl- | C15H13N | 55501273 | 8.43 |
| 39 | 23.674 | Thiocarbamic acid, N, N-dimethyl, S-1,3-diphenyl-2-butenyl ester | C19H21NOS | 32027955 | 4.86 |
| 40 | 23.834 | (2,3-Diphenylcyclopropyl) methyl phenyl sulfoxide, trans- | C22H20OS | 11352414 | 1.72 |
| 41 | 24.349 | 13-Docosenamide, (Z)- | C22H43NO | 6108115 | 0.93 |
| 42 | 24.681 | Squalene | C30H50 | 1876013 | 0.28 |
| 43 | 30.729 | Phenol, 2,4-bis(1,1-dimethylethyl)-, phosphite (3:1) | C42H63O3P | 1390700 | 0.21 |
| 44 | 33.928 | Benzenepropanoic acid, 3,5-bis(1,1-dimethylethyl)-4-hydroxy-, octadecyl ester | C35H62O3 | 2942728 | 0.45 |

Table (3) shown *Enterobacter* sp. n2bioactive compounds that result from strain at pH 8 as a result of degradation of CPH in MSM after 5day at 30℃.

| Peak | RT | Name | Formula | Area | Area Sum % |
| --- | --- | --- | --- | --- | --- |
| 1 | 9.815 | Hexadecane | C16H34 | 30698697.8 | 1.95 |
| 2 | 10.439 | Disulfide, di-tert-dodecyl | C24H50S2 | 19011568.43 | 1.21 |
| 3 | 11.314 | 1-Tetradecanol | C14H30O | 20316534.53 | 1.29 |
| 4 | 12.493 | n-Dodecyl methacrylate | C16H30O2 | 34529044.57 | 2.19 |
| 5 | 12.573 | Isodecyl methacrylate | C14H26O2 | 23052449.35 | 1.46 |
| 6 | 12.682 | Eicosane | C20H42 | 71017136.57 | 4.51 |
| 7 | 12.82 | 1-Dodecanamine, N,N-dimethyl- | C14H31N | 74869750.26 | 4.75 |
| 8 | 12.962 | 2,4-Di-tert-butylphenol | C14H22O | 38096851.08 | 2.42 |
| 9 | 13.025 | 2-Hexadecanol | C16H34O | 54095700.73 | 3.44 |
| 10 | 13.225 | tert-Hexadecanethiol | C16H34S | 50507742.82 | 3.21 |
| 11 | 13.82 | 1-Hexadecanol, 2-methyl- | C17H36O | 27666118.38 | 1.76 |
| 12 | 13.906 | Ethanol, 2-(octadecyloxy)- | C20H42O2 | 56286161.05 | 3.57 |
| 13 | 14.467 | Octadecane, 3-ethyl-5-(2-ethylbutyl)- | C26H54 | 36884278.89 | 2.34 |
| 14 | 15.056 | Heptadecane | C17H36 | 38590414.98 | 2.45 |
| 15 | 15.205 | Tetradecane, 2,6,10-trimethyl- | C17H36 | 65061335.33 | 4.13 |
| 16 | 15.274 | 9-Oximino-2,7-diethoxyfluorene | C17H17NO3 | 24339420.46 | 1.55 |
| 17 | 15.812 | (3-Methyl-1,4-diphenylbicyclo[2.2.0]hex-2-yl)methanol | C20H22O | 44331985.67 | 2.82 |
| 18 | 17.454 | 5-Hydroxy-6-methyl-12,13-dioxa-tricyclo[7.3.1.0(1,6)]tridecane-8-carboxylic acid, methyl ester | C14H22O5 | 53521035.98 | 3.4 |
| 19 | 17.563 | 7,9-Di-tert-butyl-1-oxaspiro(4,5)deca-6,9-diene-2,8-dione | C17H24O3 | 89566907.56 | 5.69 |
| 20 | 17.877 | Estra-1,3,5(10)-trien-17.beta.-ol | C18H24O | 83015983.96 | 5.27 |
| 21 | 17.975 | n-Hexadecanoic acid | C16H32O2 | 161309197.3 | 10.24 |
| 22 | 18.289 | Chlorpyrifos | C9H11Cl3NO3PS | 117755232.1 | 7.48 |
| 23 | 18.718 | cis-13-Eicosenoic acid | C20H38O2 | 21883152.68 | 1.39 |
| 24 | 19.485 | Octadecanoic acid, 4-hydroxy-, methyl ester | C19H38O3 | 68729979.06 | 4.36 |
| 25 | 19.737 | Isooctadecanoic acid | C18H36O2 | 53350763.49 | 3.39 |
| 26 | 19.851 | 2-Methyl-cis-7,8-epoxynonadecane | C20H40O | 35200818.76 | 2.24 |
| 27 | 21.677 | Tetracosane | C24H50 | 33002687.8 | 2.1 |
| 28 | 22.489 | 17-Pentatriacontene | C35H70 | 17919596.58 | 1.14 |
| 29 | 22.953 | Bis(2-ethylhexyl) phthalate | C24H38O4 | 36626262.27 | 2.33 |
| 30 | 24.664 | 4H-1-Benzopyran-4-one, 2-(3,4-dimethoxyphenyl)-3,5-dihydroxy-7-methoxy- | C18H16O7 | 18616693.86 | 1.18 |
| 31 | 31.49 | Phenol, 2,4-bis(1,1-dimethylethyl)-, phosphite (3:1) | C42H63O3P | 51430405.51 | 3.27 |
| 32 | 34.986 | Benzenepropanoic acid, 3,5-bis(1,1-dimethylethyl)-4-hydroxy-, octadecyl ester | C35H62O3 | 23436213.66 | 1.49 |

Table (4). Major bioactive compounds that result from *Enterobacter* sp*.* at **pH 9**,150 ppm and 30℃ as a result of degradation of CPF in liquid MSM after 5 day.

| Peak | Center X | Name | Formula | Area | Area Sum % |
| --- | --- | --- | --- | --- | --- |
| 1 | 4.139 | Sorbitol | C6H14O6 | 796053.1 | 0.38 |
| 2 | 4.179 | D-Galactose | C6H12O6 | 617293.1 | 0.3 |
| 3 | 4.39 | Ethane, 1,1,2,2-tetrachloro- | C2H2Cl4 | 725137.8 | 0.35 |
| 4 | 5.203 | Hexanoic acid | C6H12O2 | 539689.5 | 0.26 |
| 5 | 5.26 | Ethane, pentachloro- | C2HCl5 | 1292580 | 0.62 |
| 6 | 5.5 | Decane | C10H22 | 1222942 | 0.59 |
| 7 | 6.668 | Ethane, hexachloro- | C2Cl6 | 556775.5 | 0.27 |
| 8 | 6.794 | Methyl 2-furoate | C6H6O3 | 358639.5 | 0.17 |
| 9 | 6.937 | Undecane | C11H24 | 3069556 | 1.47 |
| 10 | 6.977 | Nonane, 4,5-dimethyl- | C11H24 | 1047568 | 0.5 |
| 11 | 7.034 | Nonanal | C9H18O | 833869 | 0.4 |
| 12 | 7.24 | Phenylethyl Alcohol | C8H10O | 623659.4 | 0.3 |
| 13 | 8.27 | 1-Dodecanol | C12H26O | 1297224 | 0.62 |
| 14 | 8.499 | Benzenepropanol, gamma.-methyl- | C10H16D3BrO | 452068.1 | 0.22 |
| 15 | 8.745 | 1,3-Butadiene, 1,1,2,3,4,4-hexachloro- | C4Cl6 | 385355.2 | 0.18 |
| 16 | 9.523 | Hexadecane | C16H34 | 4551923 | 2.18 |
| 17 | 10.885 | Propanoic acid, 2-methyl-, 3-hydroxy-2,2,4-trimethylpentyl ester | C12H24O3 | 465583.3 | 0.22 |
| 18 | 11.016 | 1-Tetradecanol | C14H30O | 3645265 | 1.75 |
| 19 | 11.114 | Tetradecane | C14H30 | 1352777 | 0.65 |
| 20 | 12.602 | 2,4-Di-tert-butylphenol | C14H22O | 2166668 | 1.04 |
| 21 | 12.899 | Disulfide, di-tert-dodecyl | C24H50S2 | 3353128 | 1.61 |
| 22 | 13.5 | (E)-2-nonadecene | C19H38 | 4407783 | 2.11 |
| 23 | 13.586 | Nonadecane | C19H40 | 3871039 | 1.86 |
| 24 | 13.637 | Phen-1,4-diol, 2,3-dimethyl-5-trifluoromethyl- | C9H9F3O2 | 983262.2 | 0.47 |
| 25 | 14.032 | Naphthalene, decahydro-1,4a-dimethyl-7-(1-methylethyl)-, [1S-(1.alpha.,4a.alpha.,7.alpha.,8a.beta.)]- | C15H28 | 3427815 | 1.64 |
| 26 | 14.307 | Benzene, 1,1'-(1,3-propanediyl) bis- | C15H16 | 8039541 | 3.85 |
| 27 | 14.724 | Tetradecane, 2,6,10-trimethyl- | C17H36 | 5000527 | 2.4 |
| 28 | 14.867 | [2.2]Paracyclophane | C16H16 | 7980536 | 3.83 |
| 29 | 15.337 | Hexadecane, 2,6,10,14-tetramethyl- | C20H42 | 4014523 | 1.92 |
| 30 | 15.531 | Benzene, 1,1'-(1,2-cyclobutanediyl)bis-, trans- | C16H16 | 773993.5 | 0.37 |
| 31 | 15.737 | EMDP | C19H21N | 6285161 | 3.01 |
| 32 | 15.806 | Octadecane | C18H38 | 3252305 | 1.56 |
| 33 | 15.915 | tert-Hexadecanethiol | C16H34S | 2418230 | 1.16 |
| 34 | 16.086 | Isopropyl myristate | C17H34O2 | 4490984 | 2.15 |
| 35 | 16.166 | Tetraneurin - A - diol | C15H20O5 | 421127.6 | 0.2 |
| 36 | 16.561 | 7-Acetyl-6-ethyl-1,1,4,4-tetramethyltetralin | C18H26O | 5549692 | 2.66 |
| 37 | 16.727 | Benzoic acid, 2-hydroxy-, phenylmethyl ester | C14H12O3 | 3878742 | 1.86 |
| 38 | 16.842 | Docosane, 11-decyl- | C32H66 | 2869585 | 1.38 |
| 39 | 17.122 | Heptacosane | C27H56 | 5974766 | 2.86 |
| 40 | 17.191 | 7,9-Di-tert-butyl-1-oxaspiro (4,5) deca-6,9-diene-2,8-dione | C17H24O3 | 7470173 | 3.58 |
| 41 | 17.494 | n-Hexadecanoic acid | C16H32O2 | 10638457 | 5.1 |
| 42 | 17.7 | Estra-1,3,5(10)-trien-17Î²-ol | C18H24O | 1128887 | 0.54 |
| 43 | 17.934 | Chlorpyrifos | C9H11Cl3NO3PS | 34454847 | 16.52 |
| 44 | 18.65 | Oleic Acid | C18H34O2 | 818476 | 0.39 |
| 45 | 19.359 | Octadecanoic acid | C18H36O2 | 2418040 | 1.16 |
| 46 | 19.451 | Dasycarpidan-1-methanol, acetate (ester) | C20H26N2O2 | 953335.9 | 0.46 |
| 47 | 21.15 | 9-Octadecenamide, (Z)- | C18H35NO | 3147430 | 1.51 |
| 48 | 22.632 | Bis(2-ethylhexyl) phthalate | C24H38O4 | 7879604 | 3.78 |
| 49 | 23.691 | Thiocarbamic acid, N, N-dimethyl, S-1,3-diphenyl-2-butenyl ester | C19H21NOS | 431798.6 | 0.21 |
| 50 | 24.097 | 4H-1-Benzopyran-4-one, 2-(3,4-dimethoxyphenyl)-3,5-dihydroxy-7-methoxy- | C18H16O7 | 580919.6 | 0.28 |
| 51 | 24.349 | 13-Docosenamide, (Z)- | C22H43NO | 13208163 | 6.33 |
| 52 | 24.675 | Squalene | C30H50 | 3863427 | 1.85 |
| 53 | 30.729 | Phenol, 2,4-bis(1,1-dimethylethyl)-, phosphite (3:1) | C42H63O3P | 12289820 | 5.89 |
| 54 | 33.928 | Benzenepropanoic acid, 3,5-bis(1,1-dimethylethyl)-4-hydroxy-, octadecyl ester | C35H62O3 | 6318308 | 3.03 |
